# Supplementary material for: The Effect of Dietary Pattern on Metabolic Syndrome in a Suburban Population in Shanghai, China
Source: MDPI journal article supplement (doi:10.3390/nu15092185), 2023-05-04
Supplement: s1 [file s1]

**Supplementary Table S1.** DASH diet scoring system.

| Nutrient            | DASH diet<br>nutrient<br>composition <sup>a</sup> | DASH score target<br>(1) | Intermediate target<br>(2) |
|---------------------|---------------------------------------------------|--------------------------|----------------------------|
| Saturated fat       | 6% of energy                                      | 6% of energy             | 11% of energy              |
| Total fat           | 27% of energy                                     | 27% of energy            | 32% of energy              |
| Protein             | 18% of energy                                     | 18% of energy            | 16.5% of energy            |
| Cholesterol         | 150 mg                                            | 71.4 mg/1000 kcal        | 107.1 mg/1000 kcal         |
| Fiber               | 31 g                                              | 14.8 g/1000 kcal         | 9.5 g/1000 kcal            |
| Magnesium           | 500 mg                                            | 238 mg/1000 kcal         | 158 mg/1000 kcal           |
| Calcium             | 1240 mg                                           | 590 mg/1000 kcal         | 402 mg/1000 kcal           |
| Potassium           | 4700 mg                                           | 2238 mg/1000 kcal        | 1534 mg/1000 kcal          |
| Sodium <sup>b</sup> | 2400 mg                                           | 1143 mg/1000 kcal        | 1286 mg/1000 kcal          |

Abbreviation: DASH, Dietary Approaches to Stop Hypertension trial. <sup>a</sup> based on a 2100-kcal diet; <sup>b</sup> sodium target based on the Sixth Report of the Joint National Committee on Prevention, Detection, Evaluation, and Treatment of High Blood Pressure recommendations.

**Supplementary Table S2.** MD scoring system.

| Component                           | Intake<br>minimum | of<br>the | Intake of maximum<br>score | Score<br>range |
|-------------------------------------|-------------------|-----------|----------------------------|----------------|
| Vegetables (g)                      | Below<br>median   | the       | Above the median           | 0-1            |
| Fruits (g)                          | Below<br>median   | the       | Above the median           | 0-1            |
| Nuts (g)                            | Below<br>median   | the       | Above the median           | 0-1            |
| Whole grains (g)                    | Below<br>median   | the       | Above the median           | 0-1            |
| Legumes (g)                         | Below<br>median   | the       | Above the median           | 0-1            |
| Fish and seafood (g)                | Below<br>median   | the       | Above the median           | 0-1            |
| Monounsaturated/saturated fat ratio | Below<br>median   | the       | Above the median           | 0-1            |
| Red and processed                   | Above             | the       | Below the median           | 0-1            |

|             |          |       |     |
|-------------|----------|-------|-----|
| meats (g)   | median   |       |     |
|             | Females  |       |     |
|             | <5, >15  | 5-15  | 0-1 |
| Alcohol (g) | Males    |       |     |
|             | <15, >25 | 15-25 | 0-1 |

Abbreviation: MD, Mediterranean Diet.

**Supplementary Table S3.** Food groupings used in dietary pattern analysis.

| Food Groups        | Components                                               |
|--------------------|----------------------------------------------------------|
| Grain              | Rice, bread, cake, noodle, flour, pizza                  |
| Coarse cereals     | Millet, sorghum, oats                                    |
| Starchy vegetables | Potato, cassava, yam                                     |
| Vegetables         | Leafy greens, tomato, green beans, mushroom              |
| Dark vegetables    | Carrot, pepper, tomato, spinach                          |
| Fruits             | Fresh and canned (no added sugar) fruits                 |
| Dairy              | Whole milk, skim milk, flavored milk, cheese, yogurt     |
| Meats              | Chicken, duck meat, pork, beef, lamb, animal viscera     |
| Fish               | Freshwater fish, sea fish                                |
| Other seafood      | Shrimp, crab, shellfish                                  |
| Soy products       | Soybean, soy milk, tofu                                  |
| Eggs               | Whole eggs, yolk, white, preserved eggs                  |
| Sugared beverages  | Carbonated drinks, fruit or flavored drinks, soft drinks |
| Snacks             | Cakes, chocolate, mooncake, potato chips, ice cream      |
| Salted food        | Preserved meat, preserved vegetables, sausages           |

**Supplementary Table S4.** Factor loadings and dietary patterns for the 15 food groups derived from factor analysis.

| Food Groups    | Factor I | Factor II | Factor III | Factor IV | Factor V |
|----------------|----------|-----------|------------|-----------|----------|
| Grain          | -        | 0.21      | -          | -         | -0.68    |
| Coarse cereals | -        | -         | 0.69       | -         | -        |

|                    |      |      |      |      |       |
|--------------------|------|------|------|------|-------|
| Starchy vegetables | -    | -    | 0.71 | -    | -     |
| Vegetables         | -    | 0.81 | -    | -    | -     |
| Dark vegetables    | -    | 0.83 | -    | -    | -     |
| Fruits             | -    | -    | 0.41 | -    | 0.37  |
| Dairy              | -    | -    | -    | -    | 0.66  |
| Meats              | 0.48 | -    | -    | 0.35 | -0.29 |
| Fish               | 0.77 | -    | -    | -    | -     |
| Other seafood      | 0.75 | -    | -    | -    | -     |
| Soy products       | 0.30 | -    | 0.39 | 0.22 | -     |
| Eggs               | 0.27 | -    | -    | -    | -     |
| Sugared beverages  | -    | -    | -    | 0.67 | -     |
| Snacks             | -    | -    | -    | 0.56 | 0.21  |
| Salted food        | -    | -    | -    | 0.57 | -     |

---

Factor loadings of < 0.2 in absolute terms were excluded for simplicity; factor I: high protein dietary pattern; factor II: grains and vegetables dietary pattern; factor III: coarse cereals and soy products dietary pattern; factor IV: snacks and beverages dietary pattern; factor V: dairy and fruits dietary pattern.
